# Supplementary material for: Comparison of sensitivity and specificity of three diagnostic tests to detect Schistosoma mansoni infections in school children in Mwanza region, Tanzania
Source: PubMed Central journal article supplement (PMC6105001; doi:10.1371/journal.pone.0202499), 2018-08-22

**STARD diagram** to report flow of participants through the study

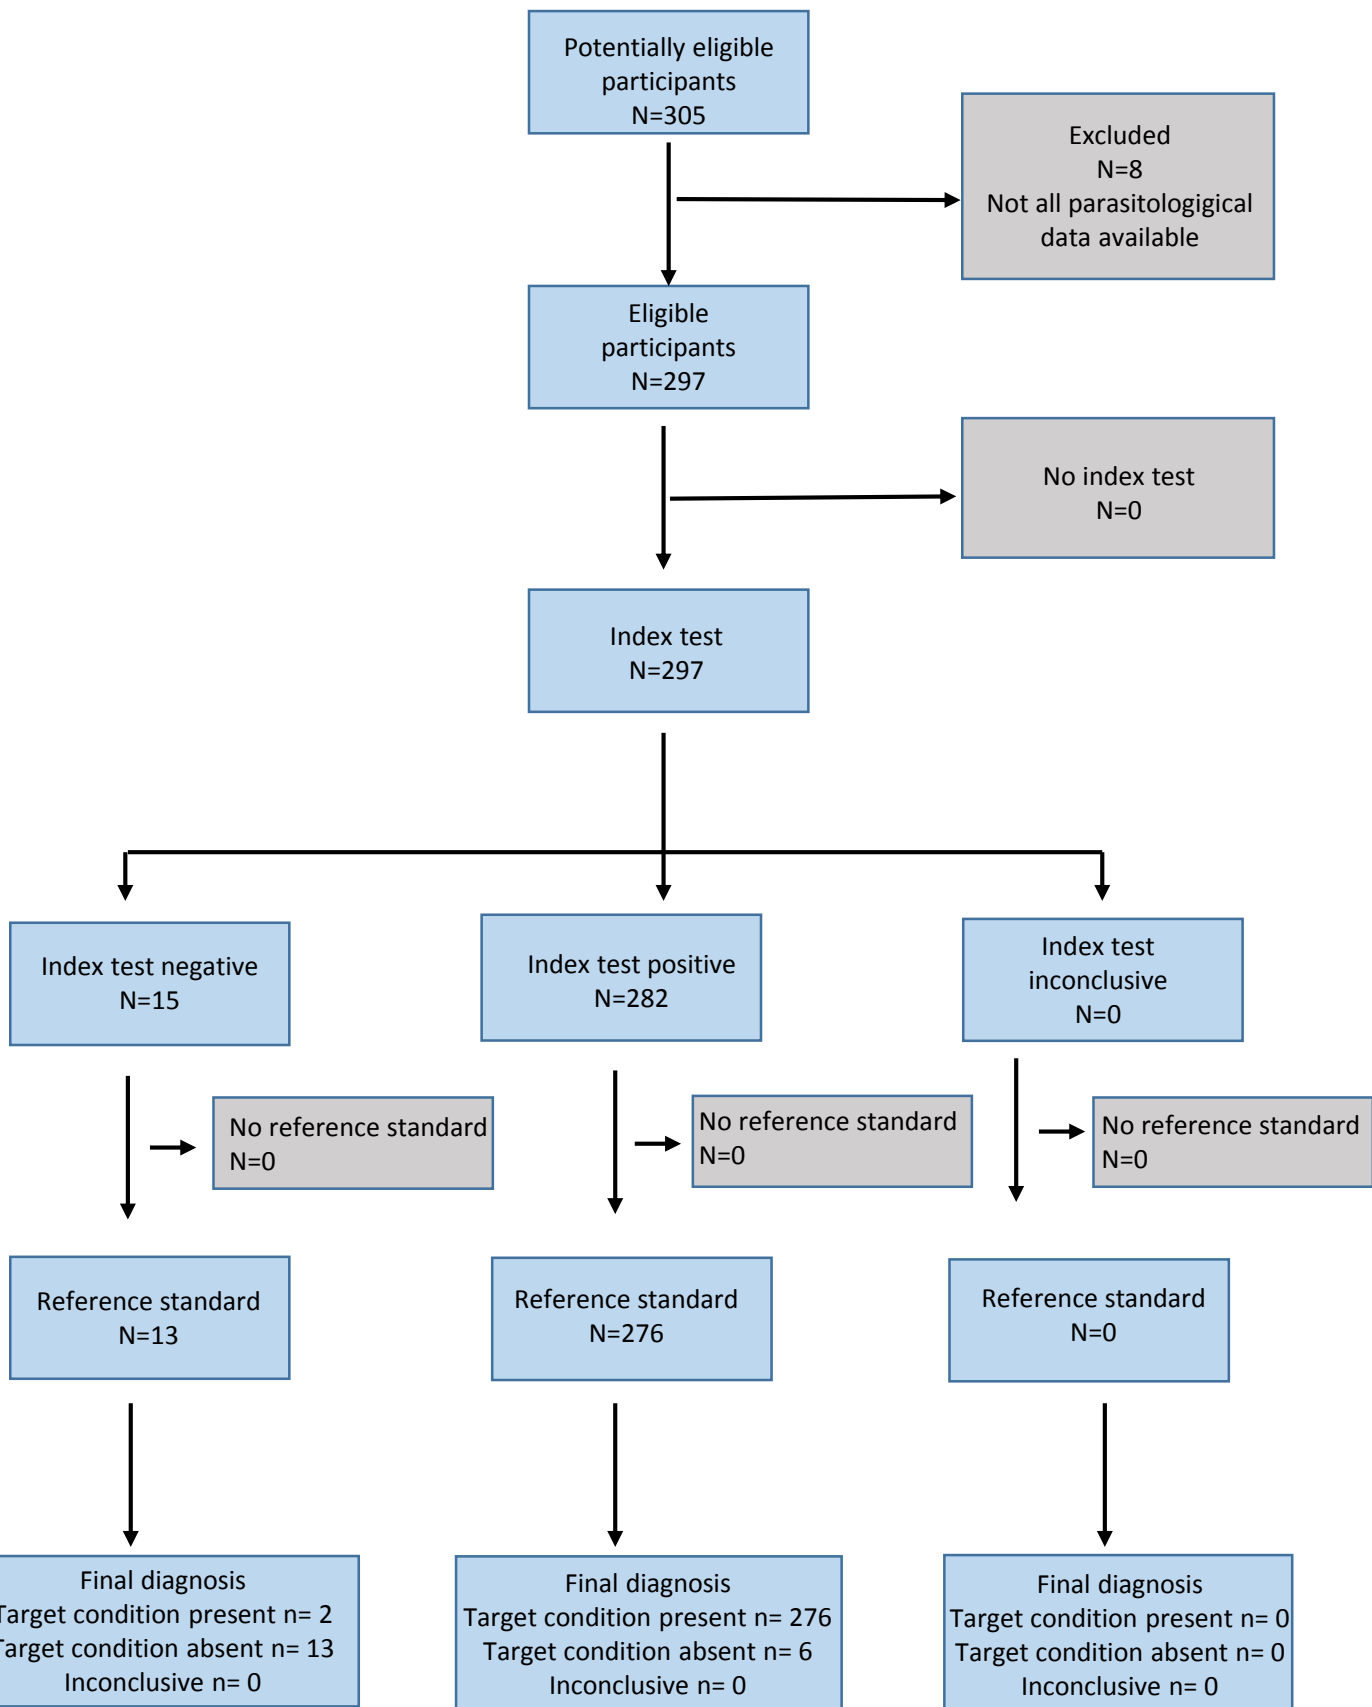

Supplement: pone.0202499.s002.pdf [file pone.0202499.s002.pdf]
