# Supplementary material for: Comparison of sensitivity and specificity of three diagnostic tests to detect Schistosoma mansoni infections in school children in Mwanza region, Tanzania
Source: PubMed Central journal article supplement (PMC6105001; doi:10.1371/journal.pone.0202499), 2018-08-22
Supplement: pone.0202499.s003.pdf [file pone.0202499.s003.pdf]

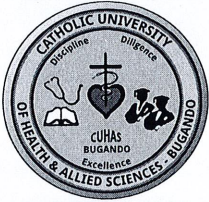

**CATHOLIC UNIVERSITY OF HEALTH  
AND ALLIED SCIENCES  
BUGANDO**

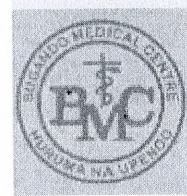

P.O. Box 1464

Phone: (255) 28-250-0881

Email: [principal@bugando.ac.tz](mailto:principal@bugando.ac.tz)

Mwanza, Tanzania

Fax: (255) 28-250-2678

Website: [www.bugando.ac.tz](http://www.bugando.ac.tz)

**CUHAS/BMC RESEARCH & ETHICAL COMMITTEE (CREC)  
ETHICAL CLEARANCE FORM**

|                                          |                                                                                                              |
|------------------------------------------|--------------------------------------------------------------------------------------------------------------|
| <b>Date</b>                              | 5 March 2015                                                                                                 |
| <b>Research Clearance Certificate No</b> | CREC/062/2014                                                                                                |
| <b>Name of researcher/PI</b>             | Antje Fuss                                                                                                   |
| <b>Purpose of the research</b>           | Pilot study                                                                                                  |
| <b>Title of the Research</b>             | Pilot study to evaluate the sensitivity of a modified technique of <i>Schistosoma</i> CCA detection in urine |
| <b>Budget and Sponsor(s)</b>             | US\$ 14,010/=<br>Wuerzburg Medical Mission Institute                                                         |
| <b>Research period</b>                   | March 2015 to August 2015                                                                                    |

**Ethical clearance is hereby granted.**

A progress report shall be submitted to the Committee every 6 months.

**CREC Chairperson**

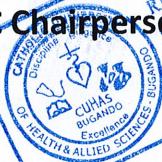

Director  
RESEARCH AND PUBLICATION  
CATHOLIC UNIVERSITY OF HEALTH  
AND ALLIED SCIENCES - BUGANDO  
P. O. BOX 1464  
MWANZA, TANZANIA.

**CREC Secretary**

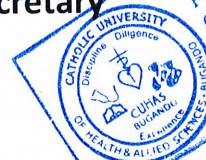

Director  
POSTGRADUATE STUDIES  
CATHOLIC UNIVERSITY OF HEALTH  
AND ALLIED SCIENCES - BUGANDO  
P. O. BOX 1464  
MWANZA, TANZANIA.
